# Supplementary material
Source: publisher figshare collection journal article supplement (https://acs.figshare.com/ndownloader/files/3736852)
Supplement: Supplementary file 1 [file 3736852]

## Supporting Information:

### Polymorphism of Two-Dimensional Cyanine Dye J-aggregates and Its Genesis: Fluorescence Microscopy and Atomic Force Microscopy Study

Valery V. Prokhorov,\* Olga M. Perelygina, Sergey I. Pozin, Eugene I. Mal'tsev, and Anatoly V. Vannikov

A.N. Frumkin Institute of Physical Chemistry and Electrochemistry, RAS, Leninsky prospect 31, Moscow, 199071, Russia

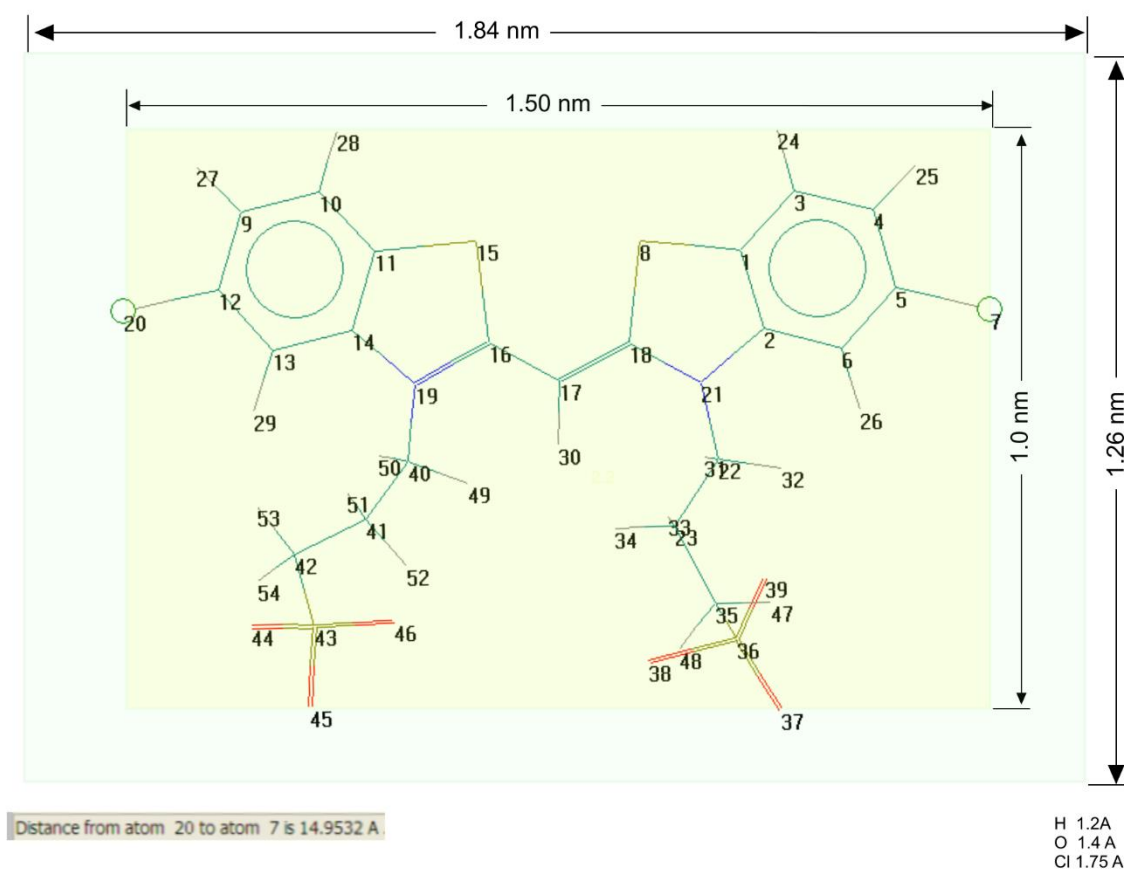

**Figure S1.** The dimensions of the TC molecule with mostly extended sulfopropyl chains obtained on the base of the Chem Draw modeling (inner yellow rectangle). The outer light yellow rectangle additionally includes van-der-Waals radii of outer Cl, O, and H atoms.
